# Supplementary material for: A prognostic model for colorectal cancer based on CEA and a 48-multiplex serum biomarker panel
Source: PubMed Central journal article supplement (PMC7900104; doi:10.1038/s41598-020-80785-1), 2021-02-22
Supplement: 41598_2020_80785_MOESM1_ESM.pdf [file 41598_2020_80785_MOESM1_ESM.pdf]

## A Prognostic Model for Colorectal Cancer based on CEA and a 48-multiplex Serum Biomarker Panel

Kajsa Björkman<sup>1</sup>, Sirpa Jalkanen<sup>2</sup>, Marko Salmi<sup>2</sup>, Harri Mustonen<sup>1</sup>, Tuomas Kaprio<sup>1</sup>, Henna Kekki<sup>3</sup>, Kim Pettersson<sup>3</sup>, Camilla Böckelman<sup>1,4\*</sup> and Caj Haglund<sup>1,4\*</sup>

<sup>1</sup>Research Programs Unit, Translational Cancer Medicine, University of Helsinki, Helsinki, Finland

<sup>2</sup>MediCity Research Laboratory and Institute of Biomedicine, University of Turku, Turku, Finland

<sup>3</sup>Department of Biochemistry, University of Turku, Turku, Finland

<sup>4</sup>Department of Surgery, University of Helsinki and Helsinki University Hospital, Helsinki, Finland

\*Shared last authorship

### Supplementary figure 1

#### A. Background model

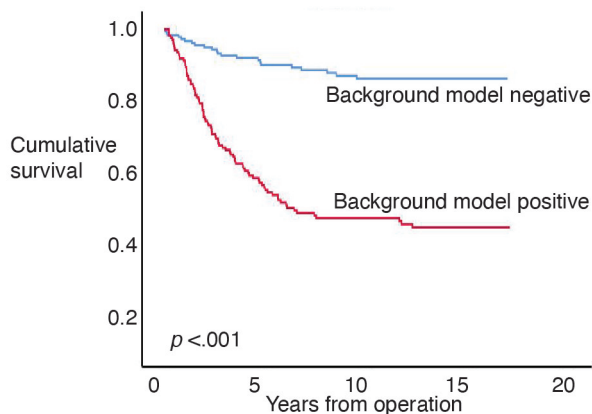

|          |          |     |     |    |    |
|----------|----------|-----|-----|----|----|
| Patients | negative | 176 | 120 | 95 | 22 |
| at risk  | positive | 159 | 65  | 45 | 6  |

#### B. Study model

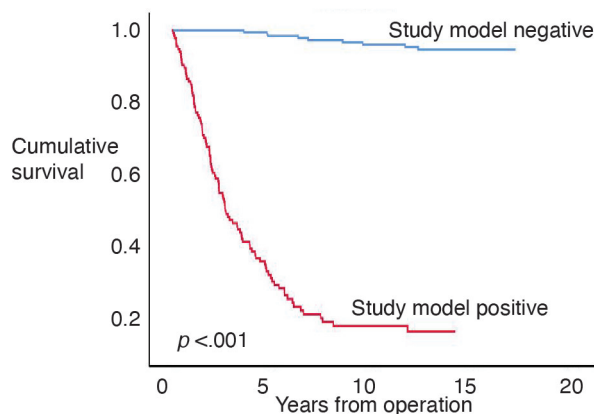

|          |          |     |     |     |    |
|----------|----------|-----|-----|-----|----|
| Patients | negative | 197 | 163 | 135 | 27 |
| at risk  | positive | 131 | 20  | 4   | 0  |
